# Supplementary material for: Genetic inactivation of the β1 adrenergic receptor prevents cerebral cavernous malformations in zebrafish
Source: eLife. 2025 Feb 24;13:RP99455. doi: 10.7554/eLife.99455 (PMC11849999; doi:10.7554/eLife.99455)
Supplement: Supplementary file 1. — “?” means it is yet to be determined. “-” means it is not applicable. “1”. Perilesional red blood cell leakage was seen. [file elife-99455-supp1.xlsx]

## Sheet: Sheet1
		zebrafish		mouse	human
		CVP	CCM
pathology	Multi-cavernous Malformations	yes	yes	yes	yes
	Perilesional Iron Deposition	yes1	yes	yes	yes
	Sluggish Blood Flow	yes	?	yes	yes
	Widely Distribution in Brain	_	yes	only in cerebellum in acute model; yes in chronic model	yes
	Extracranial lesions	_	yes	Not reported	yes
Genetics	Mosaic inactivation of CCM genes	yes	yes	Pan-endothelial inactivation in acute model; yes in chronic model	yes
	Dependent on mekk3-klf2	yes	yes	yes	?
Response to chemicals	ROCK inhibitor	yes	?	yes	?
	propranolol	yes	yes	yes	?
