# Supplementary material for: Genetic inactivation of the β1 adrenergic receptor prevents cerebral cavernous malformations in zebrafish
Source: eLife. 2025 Feb 24;13:RP99455. doi: 10.7554/eLife.99455 (PMC11849999; doi:10.7554/eLife.99455)
Supplement: Supplementary file 2. — These genomic sites were sequenced and found no mutations. Primer sequence used for amplifying these sites were listed. [file elife-99455-supp2.xlsx]

## Sheet: Sheet1
	DNA	Chromosome	Position	Direction	Forward Primer (5'-3')	Reverse Primer (5'-3')
1	ACTgTAAA-GCGCCAaGGGGG	1	42371490	-	GTTTCTGCAGACCCTATGACT	GCGGAAACTACAATTCCCAT
2	ACTCTAAACGCaCC-tGGGGG	1	39767245	-	GGATCCTTCTTCATCAGTGT	ATAGGTCTGCCTGCCACAAT
3	ACgCTAAA-GgGCCACGGGGG	7	16408417	-	AGCCCAGGTAATAGGCTAT	ACCACCTCACGACCATCTGT
4	ACTgTAAACGgGCCA-GGCGG	5	17418058	+	AAAGCCTCCAACTCCAGCT	AAGGGCGAAATGAAAGCGGT
5	ACTgTAAACGgGCCA-GGCGG	10	15691003	+	AACTCCAGCTGACGCAGCTT	GGCGAAATGAAAGCGGTGCT
6	ACTCTAAATaGgGCCACGGTGG	15	5533276	-	GAAAACAGTGCTGCCTGCCT	CTTATCTAGCGCTCACGGAT
7	ACTCTAAATaGgGCCACGGGGG	18	7108733	-	AGAGCAGCAGATGGCTCTGT	AGCCTTTACGATAGCCAGCT
8	ACTCTAAACTGCagCACGGCGG	15	1799001	-	GTGCGTTTATATGAGACGGT	AAGAGGATCTTGTTCCCGT
9	gCT-TAAACcCGCCACGGTGG	15	22123610	-	TCGCAAACTCCTTCAGGCGT	TTCTGTCCTCTGCGTGTAT
10	ACTgTAAACGgGCCA-GGCGG	18	21555757	-	AAGGGCGAAATGAAAGCGGT	AGCTGACGCAGCTTCACCT
11	ACTgTAAACGgGCCA-GGCGG	18	31307010	+	AAGGTGGTTGAGGTTGGAT	GAAGGCAAGCCAACACTGT
12	ACTgTAAACGgGCCA-GGCGG	18	39397336	+	CTGACGCAGCTTCACCTCTT	GCAAGCCAACACTGTCACCT
13	AtTCTAAACGaGCCACGAGAGG	23	9285575	-	ACTGACTCACAGTGCATCT	TCATACACCTCTAGTGTCCA
14	ACTgTAAA-GCtCCACGGTGG	21	45129846	-	CTGTAGTTCTTGTGGTACCT	GCTTCTCCATGTCTCTGTAT
15	ACTCTAAACG-GCCAtGtTGG	21	14360517	-	GGGCTCTCCAAATTTGACT	TCTCAGAAGGTCGAACTCT
16	ACTgTAAACGgGCCA-GGCGG	19	23345537	-	CAAGCCAACACTGTCACCT	AAAGCCTCCAACTCCAGCT
17	ACTgTAAACGgGCCA-GGCGG	23	24565926	+	GAAGGTGGTTGAGGTTGGAT	GCGAAATGAAAGCGGTGCT
18	ACTCTAAAC-aGCCAgGGGGG	25	33888849	+	GATCCTGGTTGAAGTCAGAT	TCACTTTGGCAGGACACACT
19	ACTCTAAAaG-GCCACaGAGG	25	7580951	+	TGGAAGGAAGCCTGGAGACT	GACACCAAACTTTGATCGGT
20	ACTgTAAACGgGCCA-GGCGG	25	25111696	+	AAAGCCTCCAACTCCAGCT	AAGGGCGAAATGAAAGCGGT
